# Supplementary material
Source: PubMed Central journal article supplement (PMC8164234)

A

B

HMPV

RSV

A

B

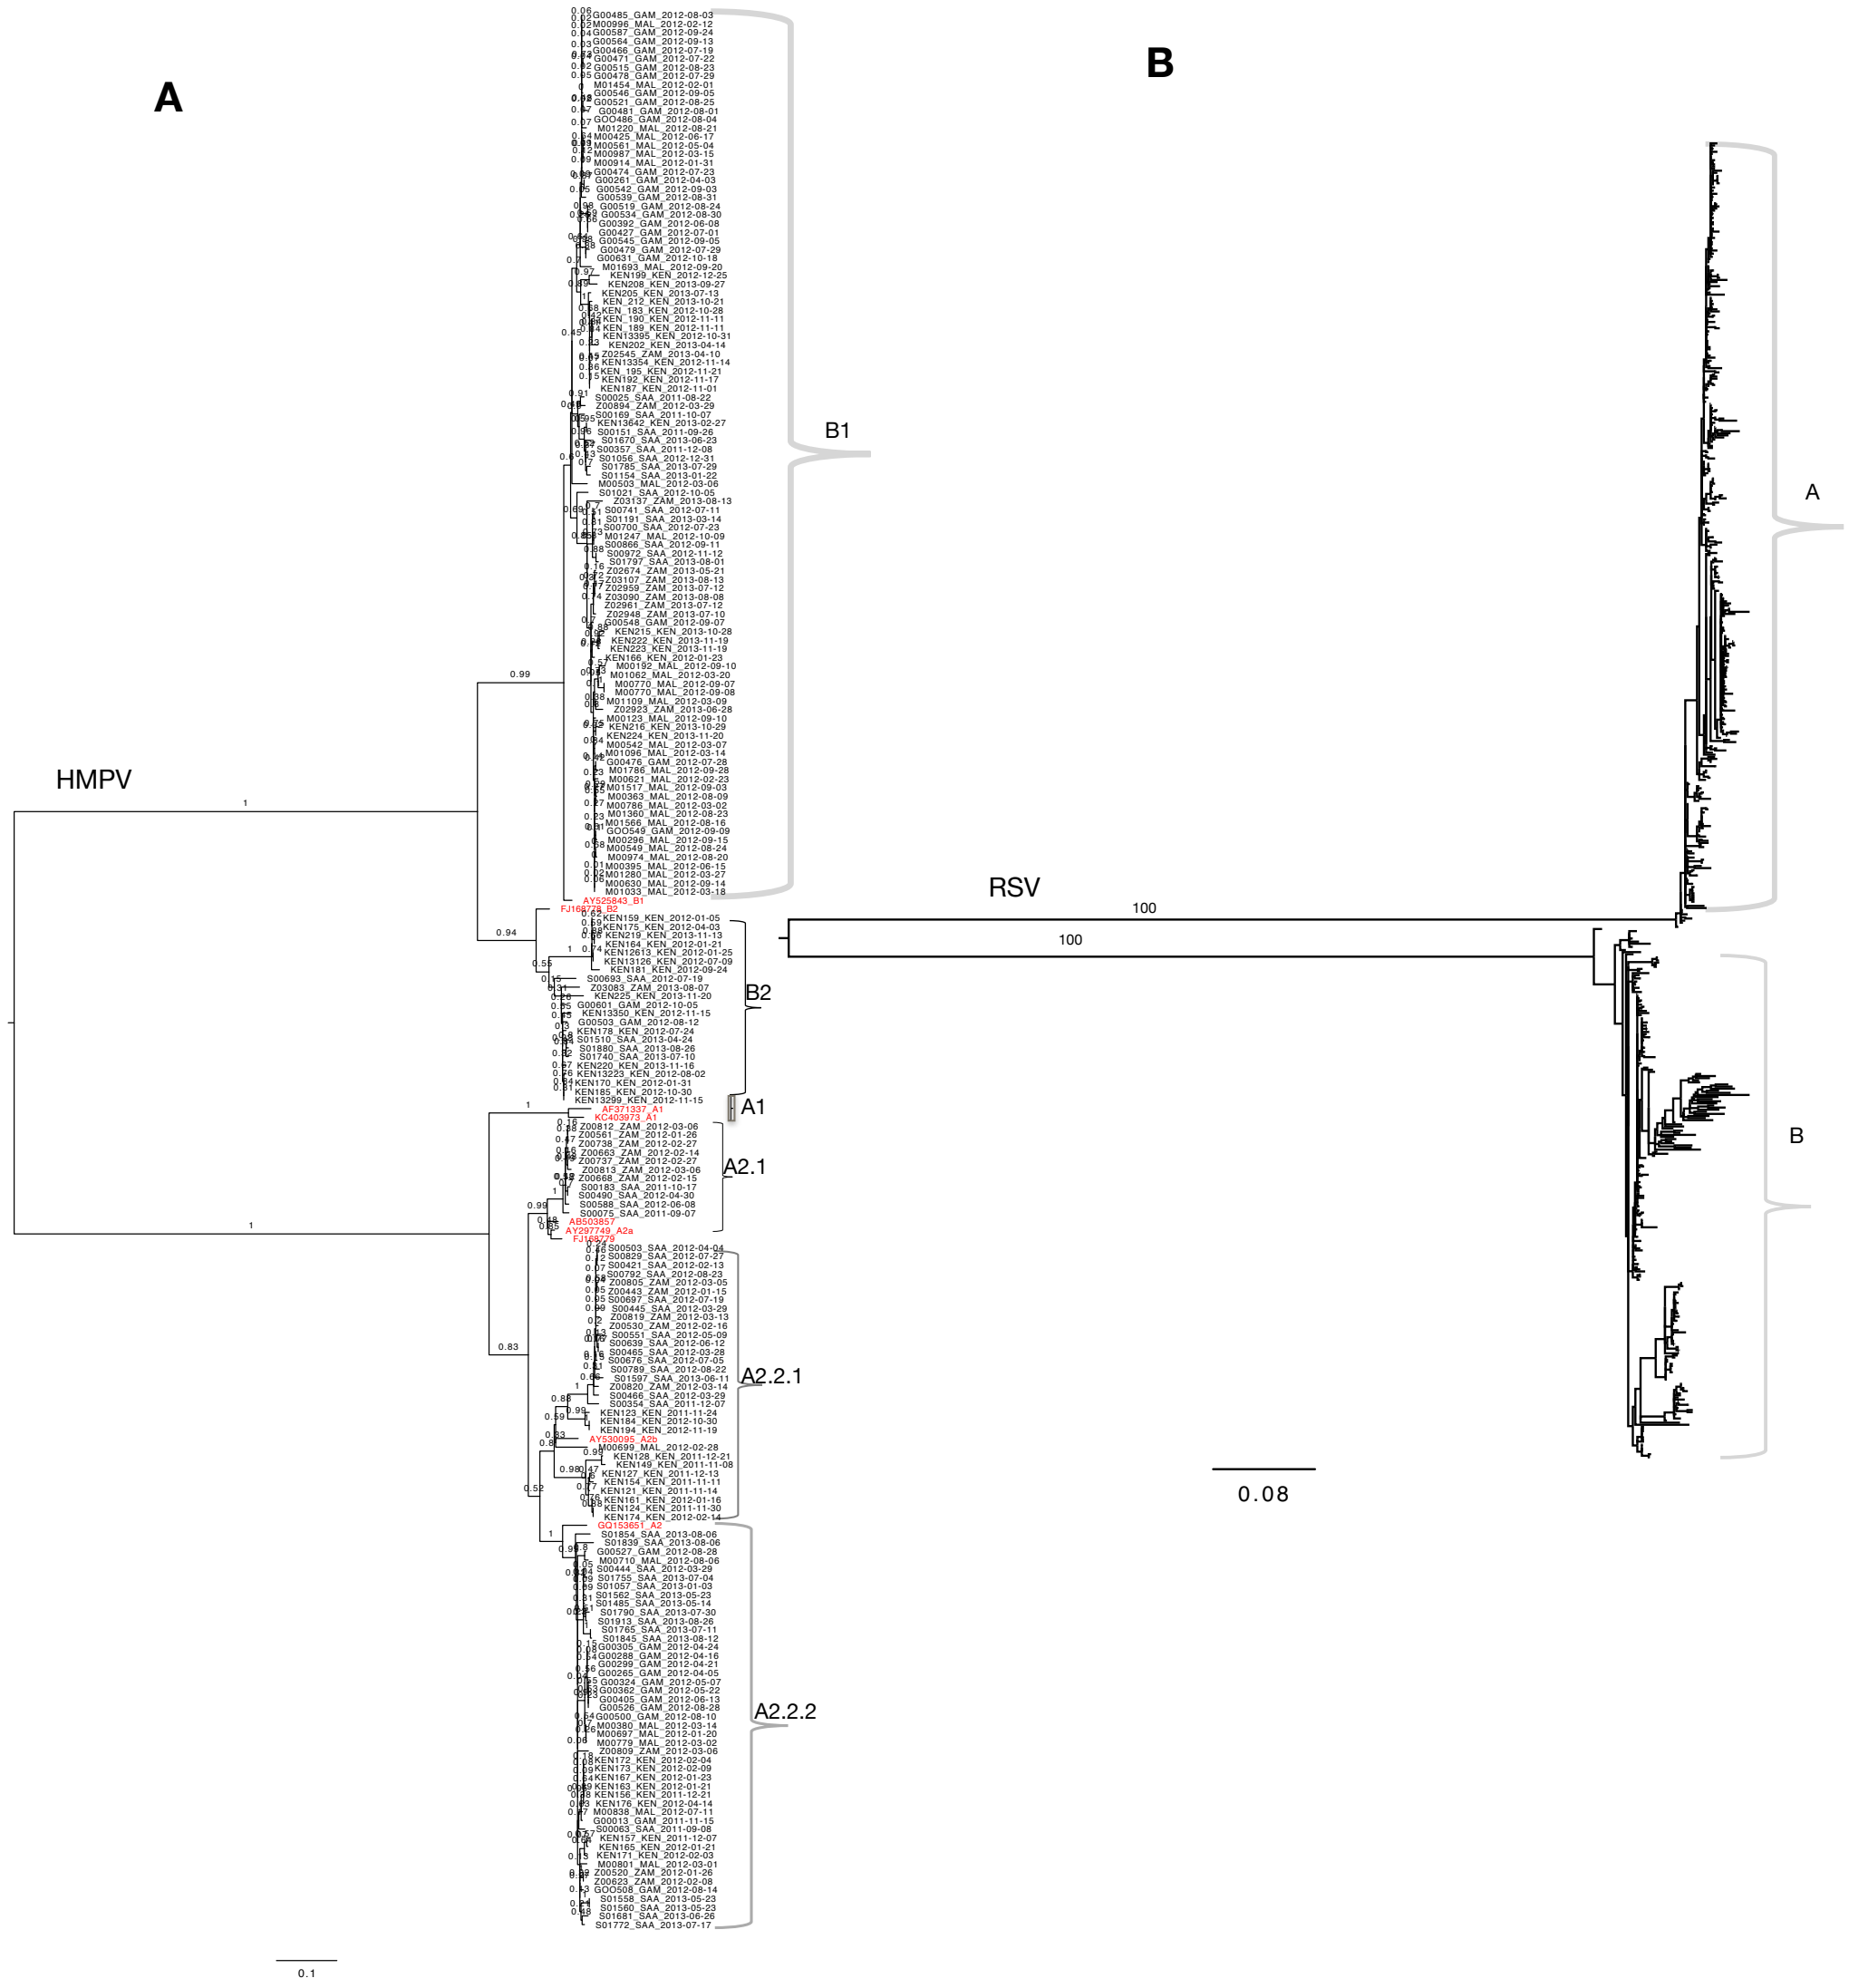

Supplement: 12985_2021_1570_MOESM4_ESM.pdf [file 12985_2021_1570_MOESM4_ESM.pdf]
