# Supplementary material
Source: PubMed Central journal article supplement (PMC8164234)

# Stratified by sampling location

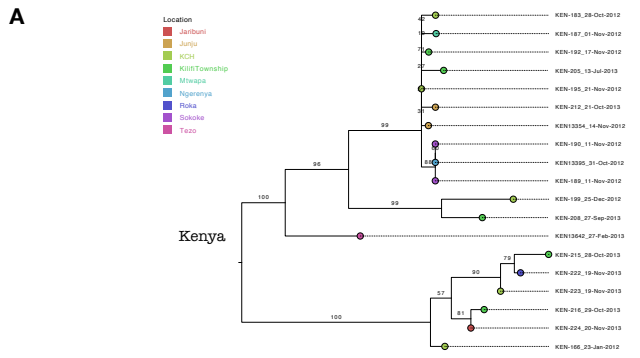

# Stratified by case/control status

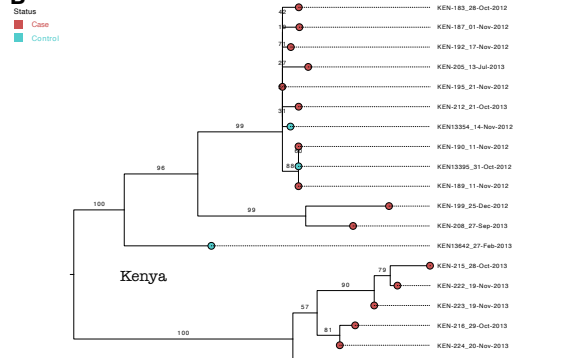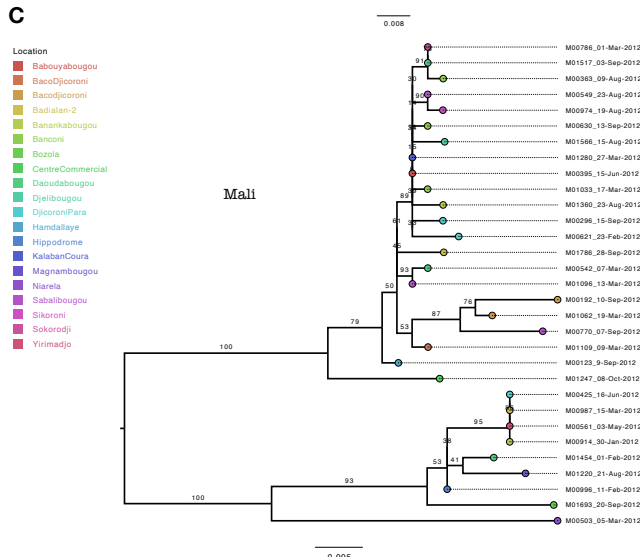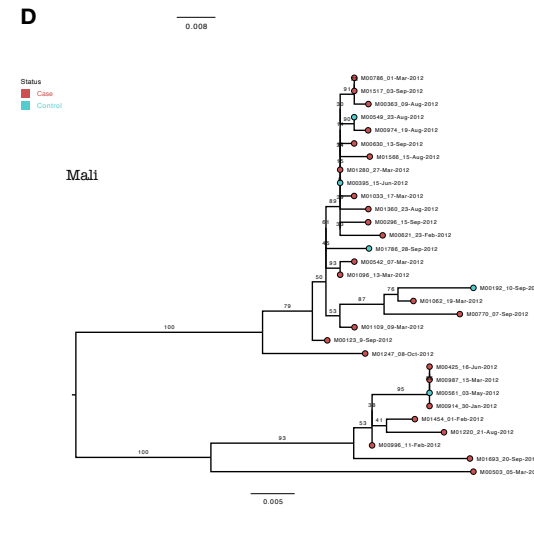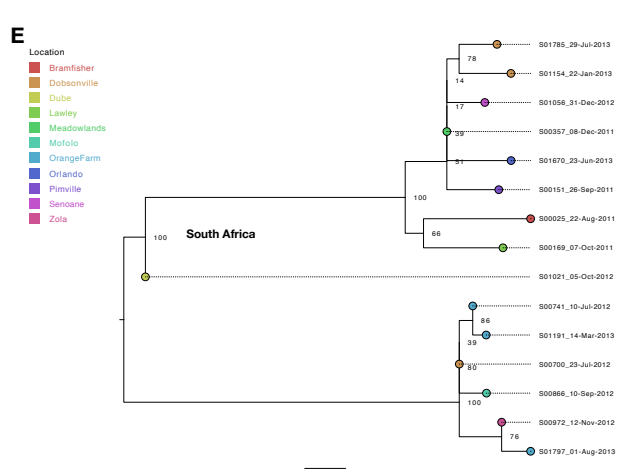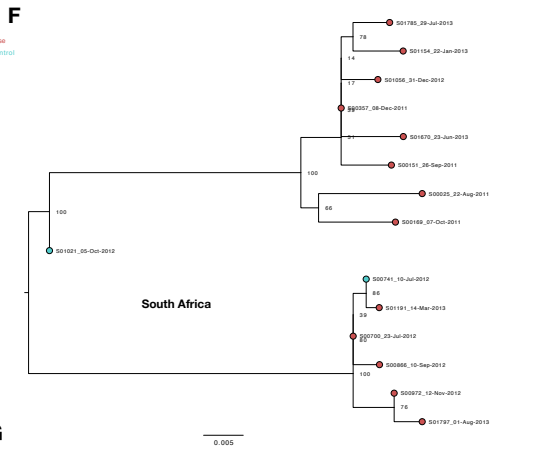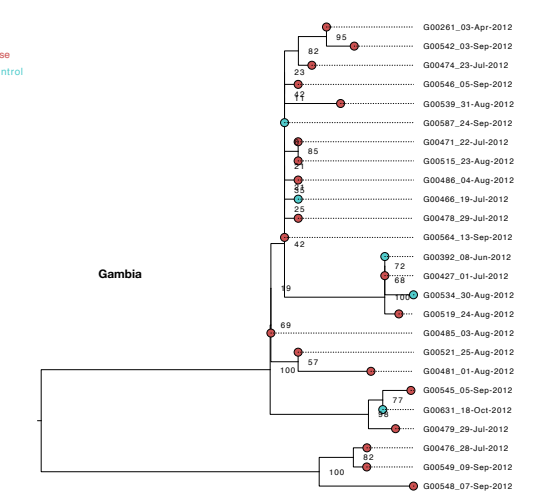

Supplement: 12985_2021_1570_MOESM5_ESM.pdf [file 12985_2021_1570_MOESM5_ESM.pdf]
