# Supplementary material
Source: PubMed Central journal article supplement (PMC8164234)

# RSV BA

**A Stratified by location**

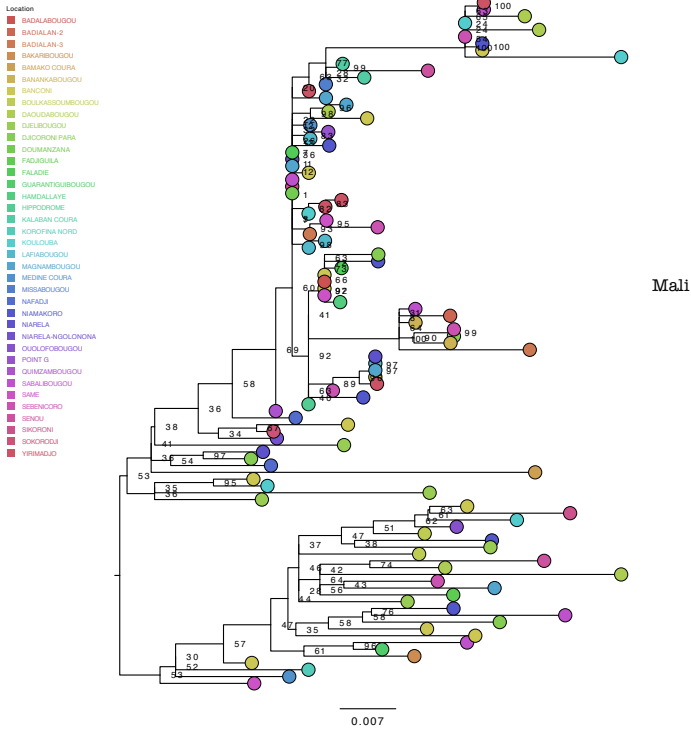

**B Stratified by case/control status**

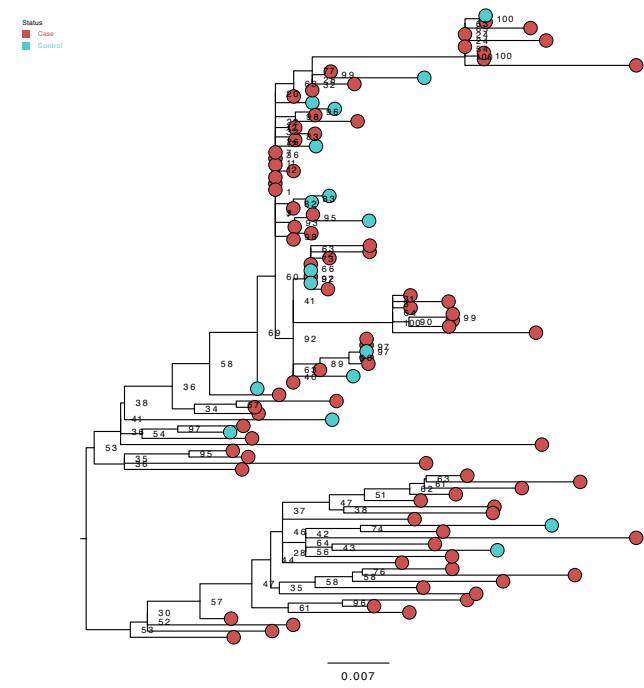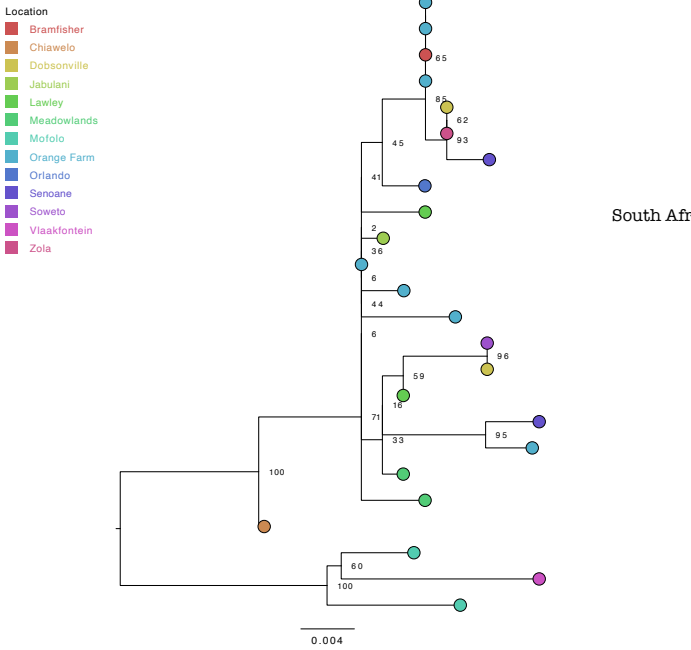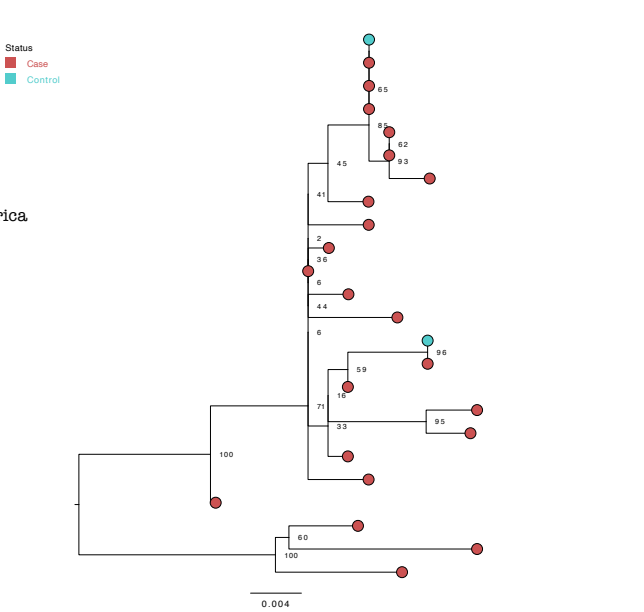

# RSV GA

**C Stratified by location**

- Location
- BACODJICORONI
  - BADALABOUGOU
  - BAGADADJI
  - BAKARIBOUGOU
  - BAMAKO COURA
  - BANANKABOUGOU
  - BANCONI
  - BOULKASSOUMBBOUGOU
  - DAOUDABOUGOU
  - DJELIBOUGOU
  - DJICORONI PARA
  - DOUMANZANA
  - FALADIE
  - HAMDALLAYE
  - KOROFINA NORD
  - KOROFINA SUD
  - KOULOUBA
  - LAFIABOUGOU
  - MAGNAMBBOUGOU
  - NIAMAKORO
  - NIARELA-NGOLONONA
  - POINT G
  - QUIMZAMBOUGOU
  - SEBENCORO
  - SIRAKORO DOUFING

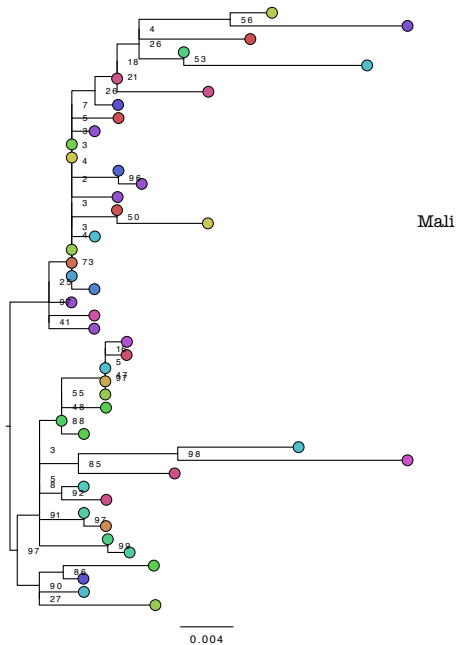

**D Stratified by case/control status**

- status
- Case
  - Control

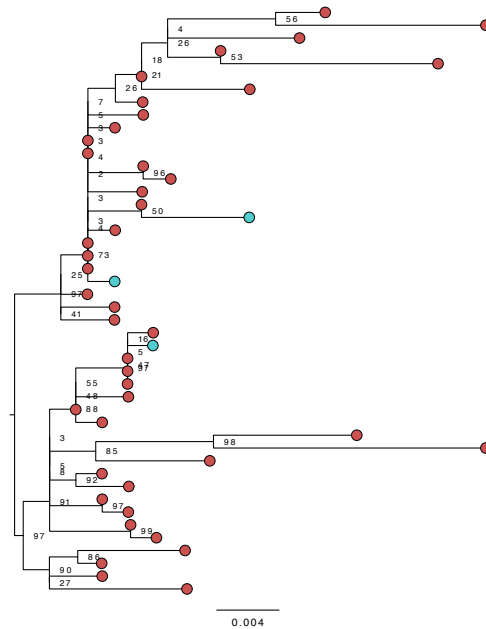

- Location
- Bramfisher
  - Chiawelo
  - Diepkloof
  - Diamini
  - Dobsonville
  - Dube
  - Eldorado Park
  - Emdeni
  - Ennerdale
  - Finetown
  - Freedom Park
  - Jabulani
  - Klipspruit
  - Kliptown
  - Lawley
  - Lenasia
  - Mapetia
  - Meadowlands
  - Mofolo
  - Motswaledi
  - Naledi
  - Orange Farm
  - Orlando
  - Phiri
  - Pimville
  - Protea Glen
  - Senoane
  - Soweto
  - Vlaakfontein
  - White City Jabavu
  - Zola

South Africa

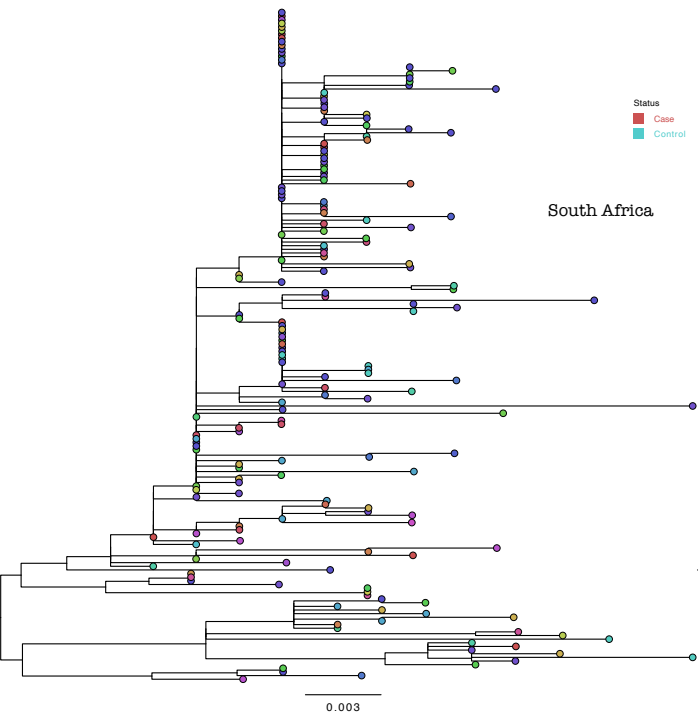

- Status
- Case
  - Control

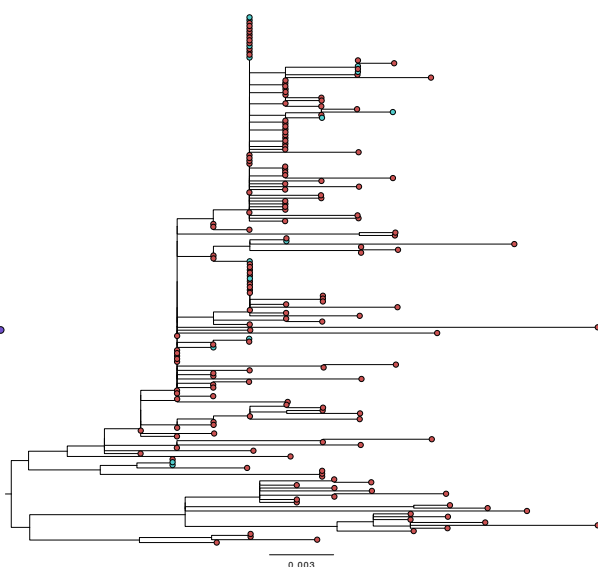

Supplement: 12985_2021_1570_MOESM7_ESM.pdf [file 12985_2021_1570_MOESM7_ESM.pdf]
